# Supplementary material for: An insight into the hybrid dye-sensitized solar cell from polyaniline–CdS nanotubes through impedance spectroscopy
Source: Royal Society of Chemistry journal article supplement (doi:10.1039/c6cp06124a), 2016-01-01
Supplement: c6cp06124a1.pdf [file c6cp06124a1.pdf]

## **Supporting Information**

### **An Insight into the Hybrid Dye-Sensitized Solar Cell from Polyaniline-CdS**

#### **Nanotubes through Impedance Spectroscopy**

Arnab Shit, Pousali Chal and Arun K. Nandi\*

Polymer Science unit, Indian Association for the Cultivation of Science,

Jadavpur, Kolkata- 700032, India

\*For Correspondence: A. K. Nandi, E-mail: [psuakn@iacs.res.in](mailto:psuakn@iacs.res.in)

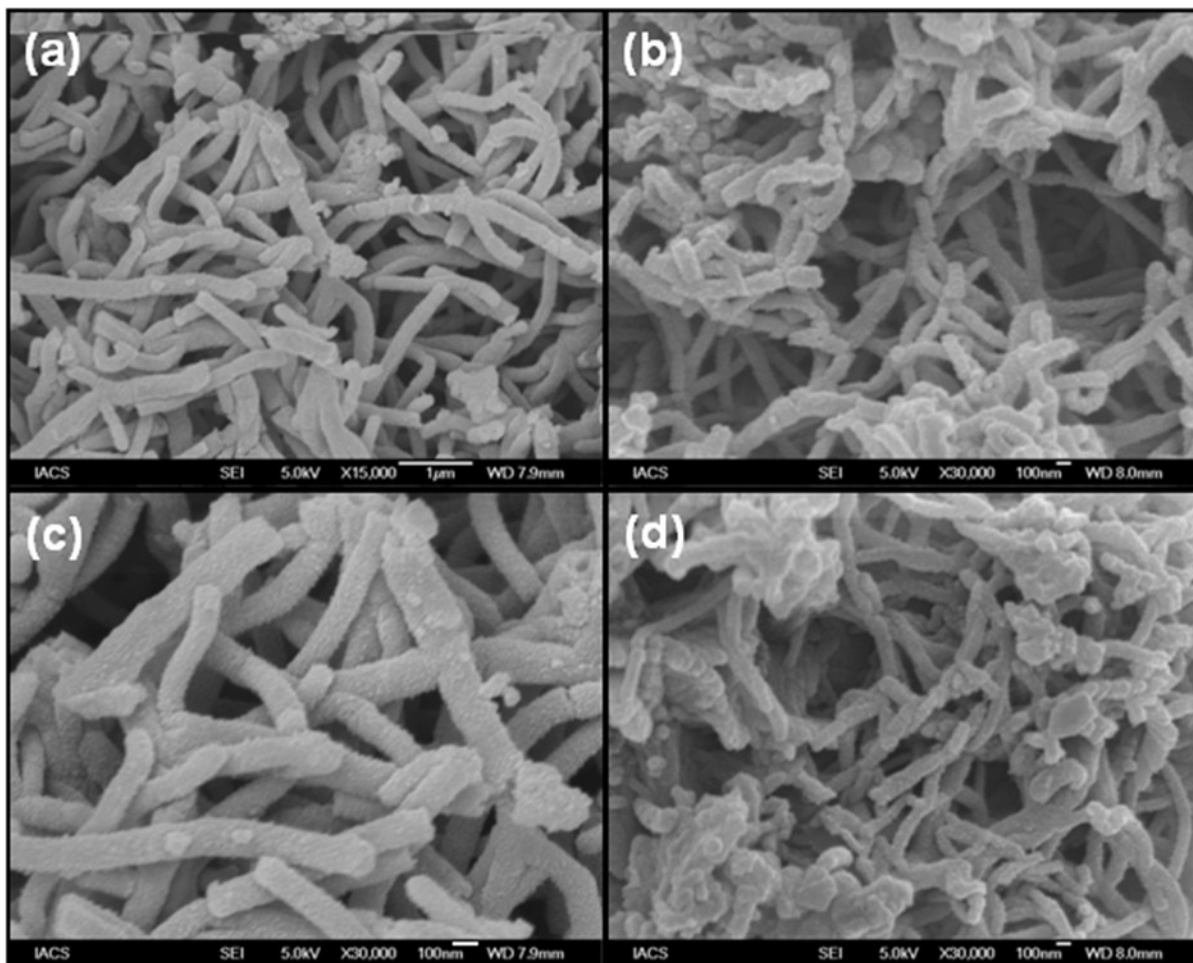

**Fig. S1:** FESEM images of (a) C25 (b) C50, (c) C100 and (d) C150 samples.

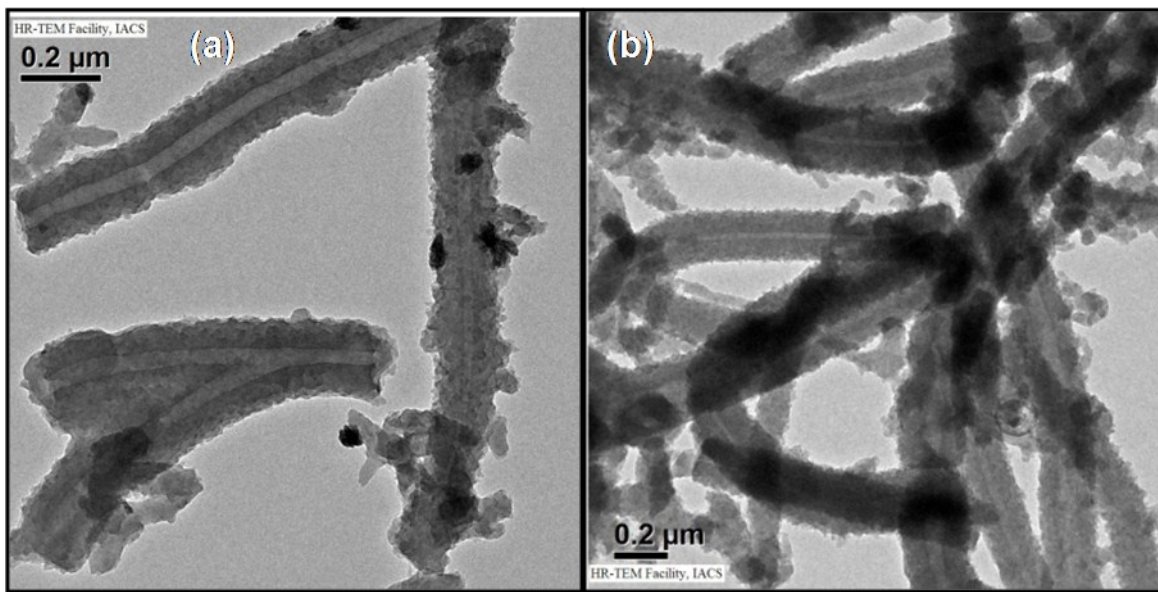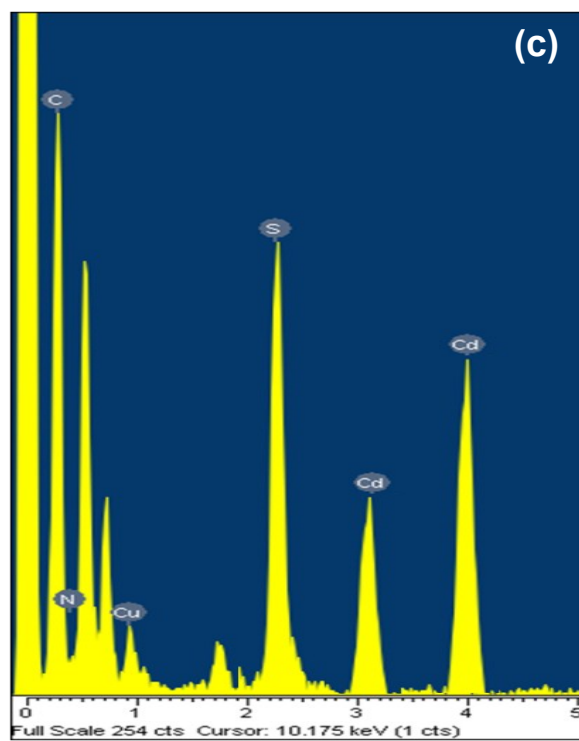

**Fig. S2:** TEM images of (a) C100, (b) C150 and (c) EDS spectra of C200.

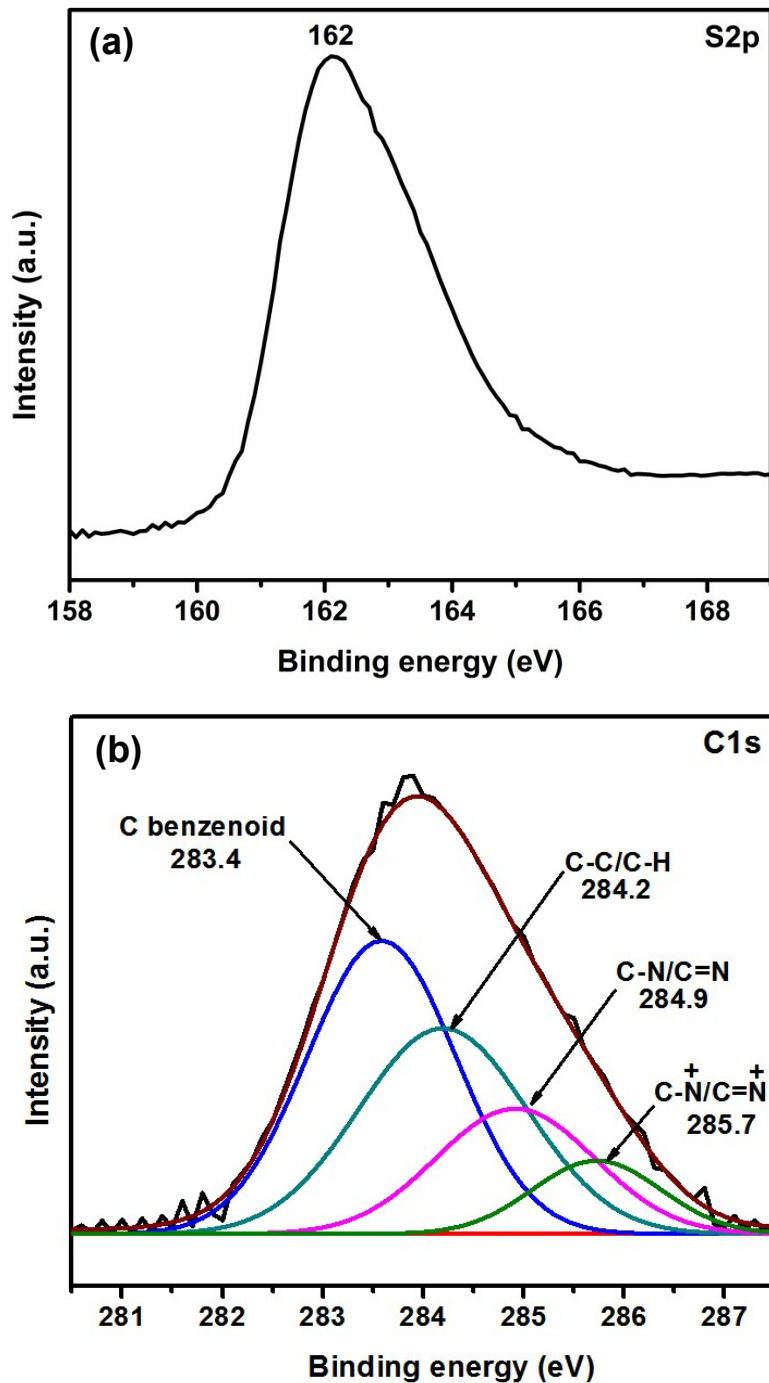

**Fig. S3:** XPS spectrum of (a) S<sub>2p</sub> of CdS in C200, (b) deconvoluted spectral part of C<sub>1s</sub> region of PANI in C200.

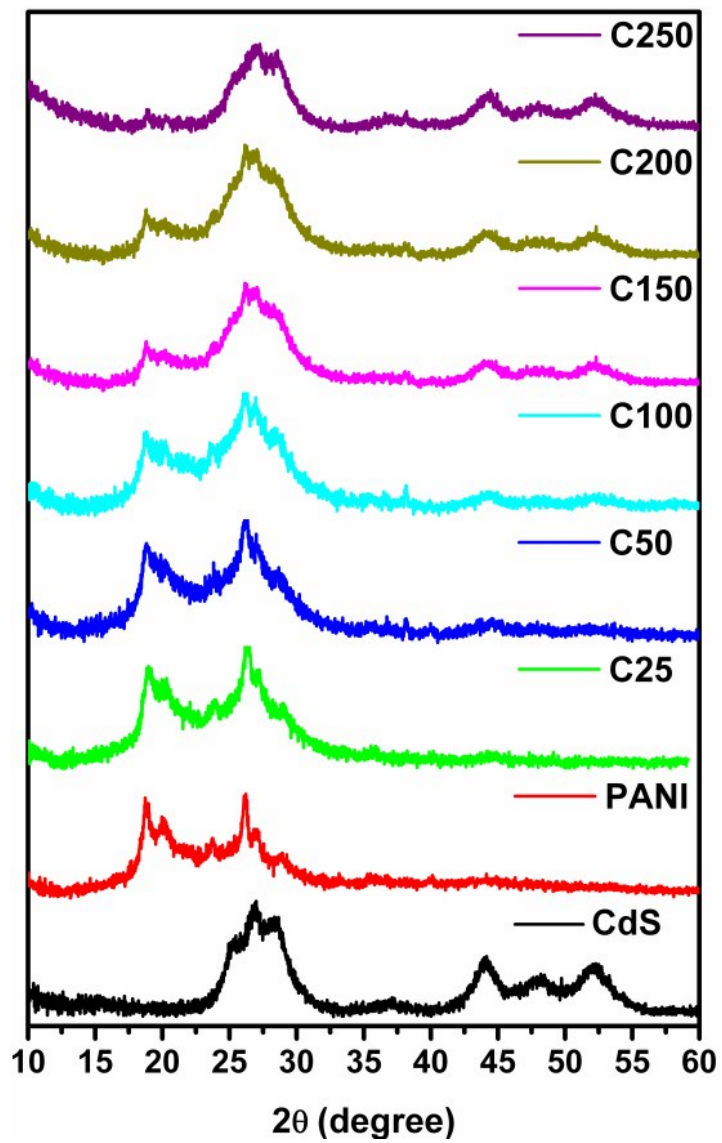

**Fig. S4:** XRD pattern of CdS, PANI and their composites.

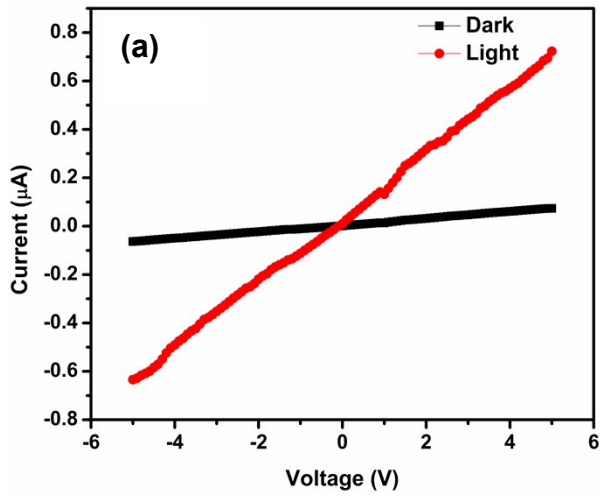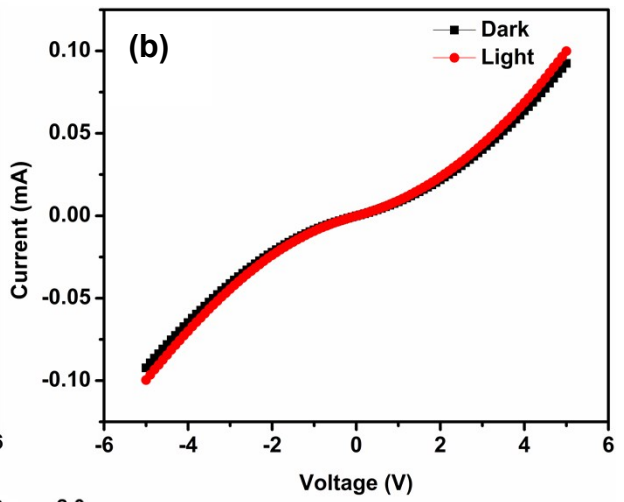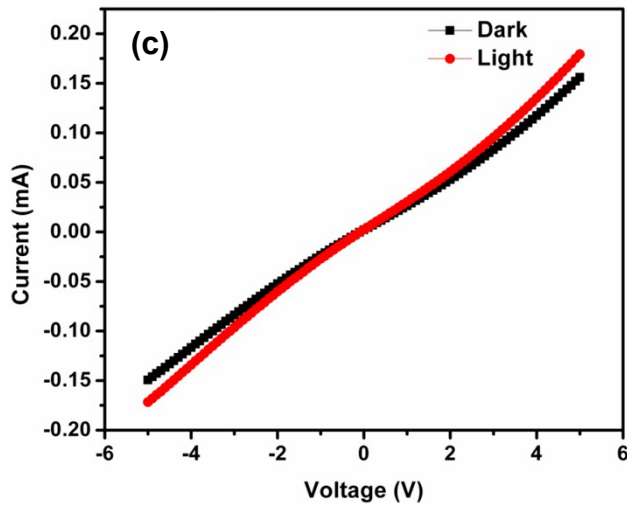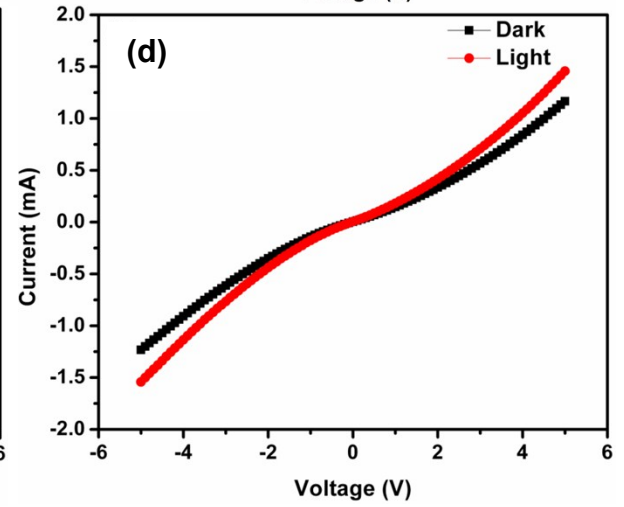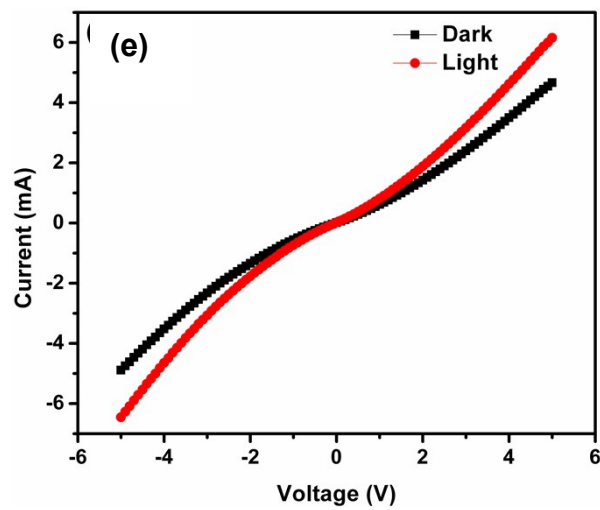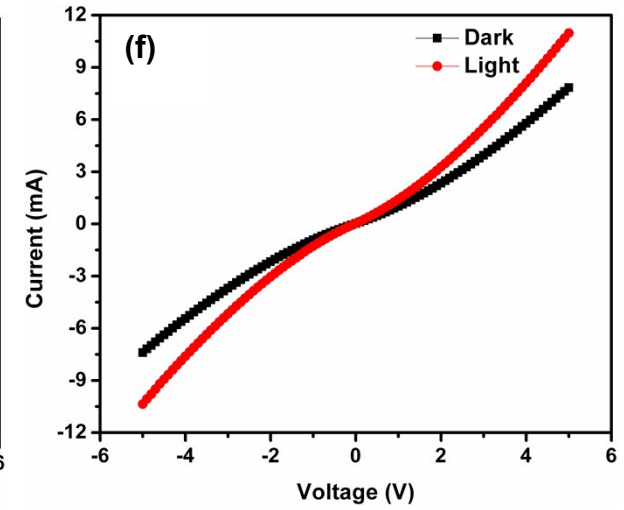

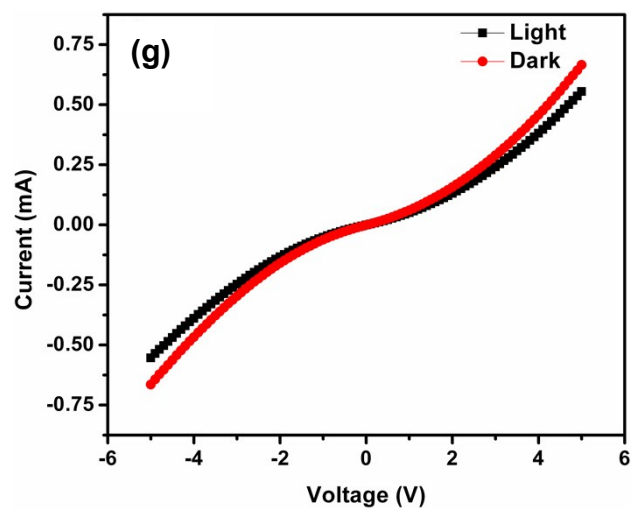

**Fig. S5:** I-V characteristics of (a) CdS (b) PANI, (c) C25, (d) C50, (e) C100, (f) C150, (g) C250 samples under dark and illumination condition.

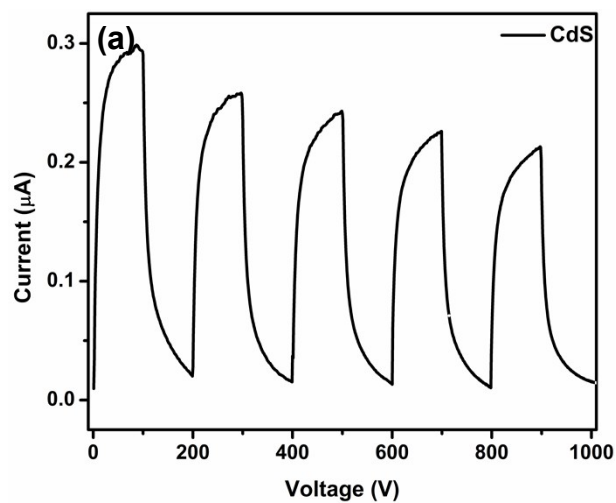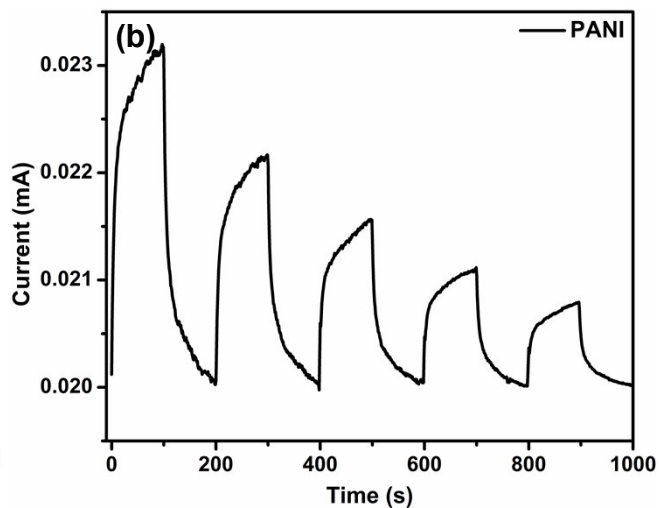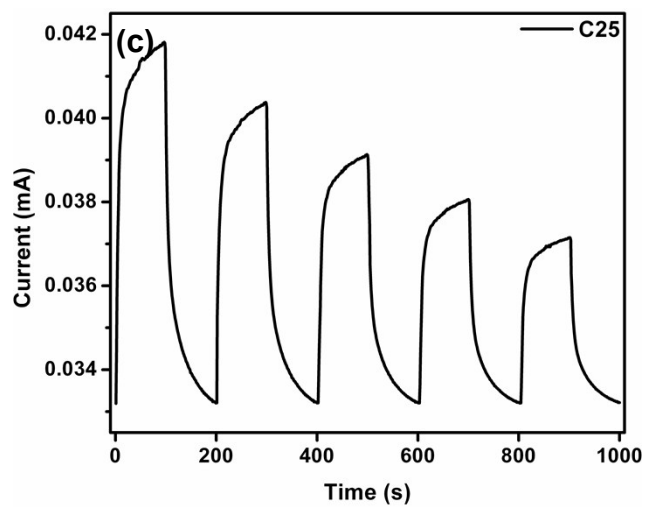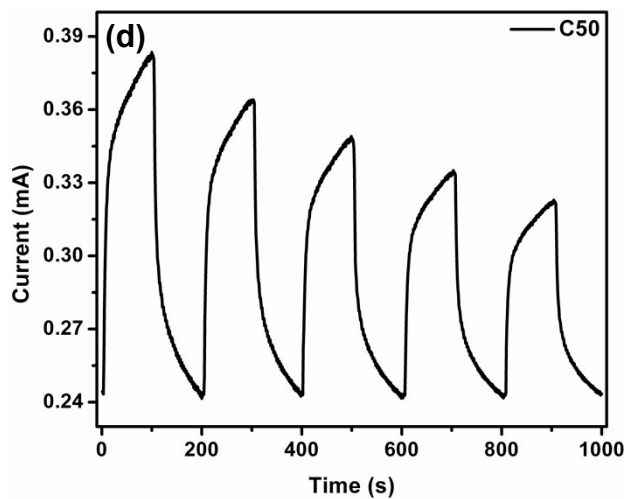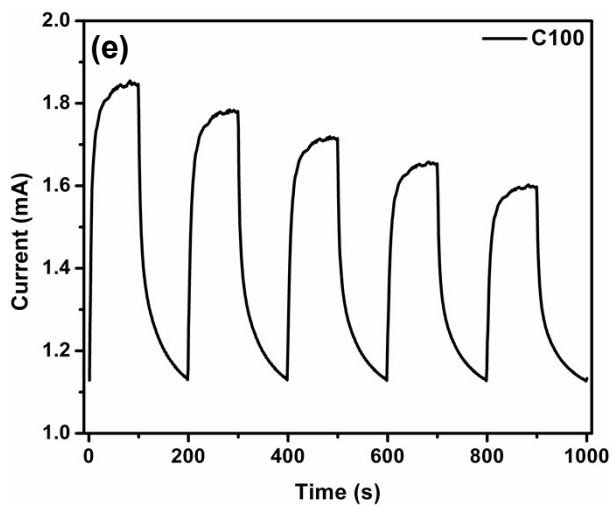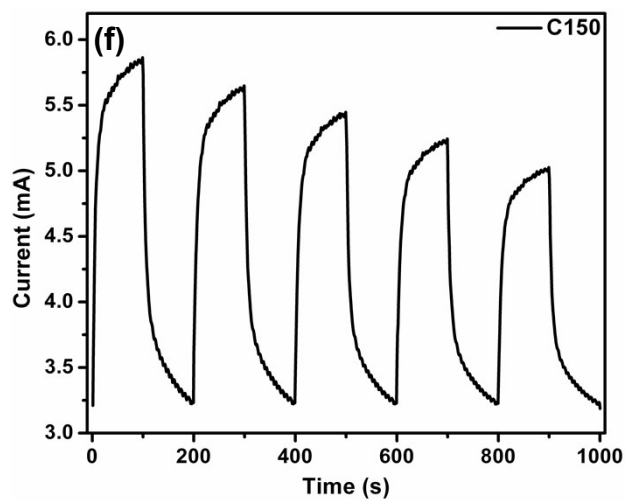



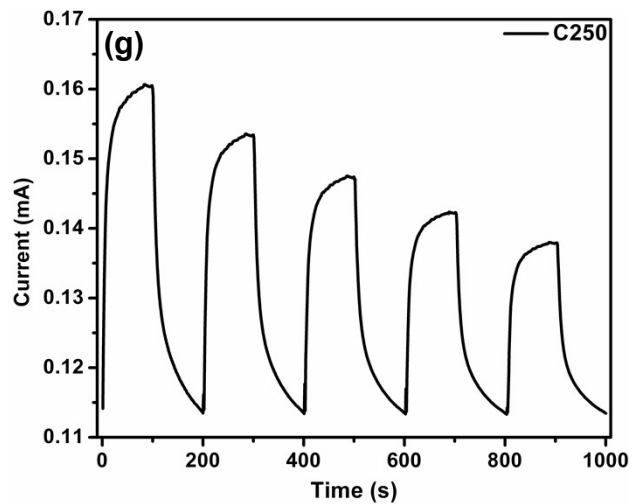

**Fig. S6:** Photoresponse properties of (a) CdS, (b) PANI, (c) C25, (d) C50, (e) C100, (f) C150 and (g) C250 samples

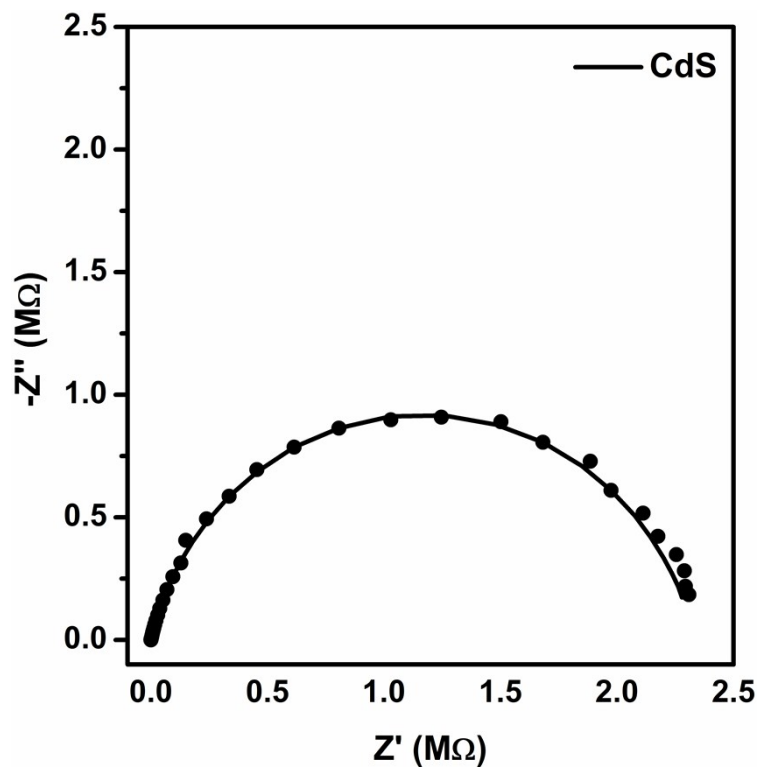

**Fig. S7:** Nyquist plot of CdS at a frequency range from 1 MHz to 1 Hz.

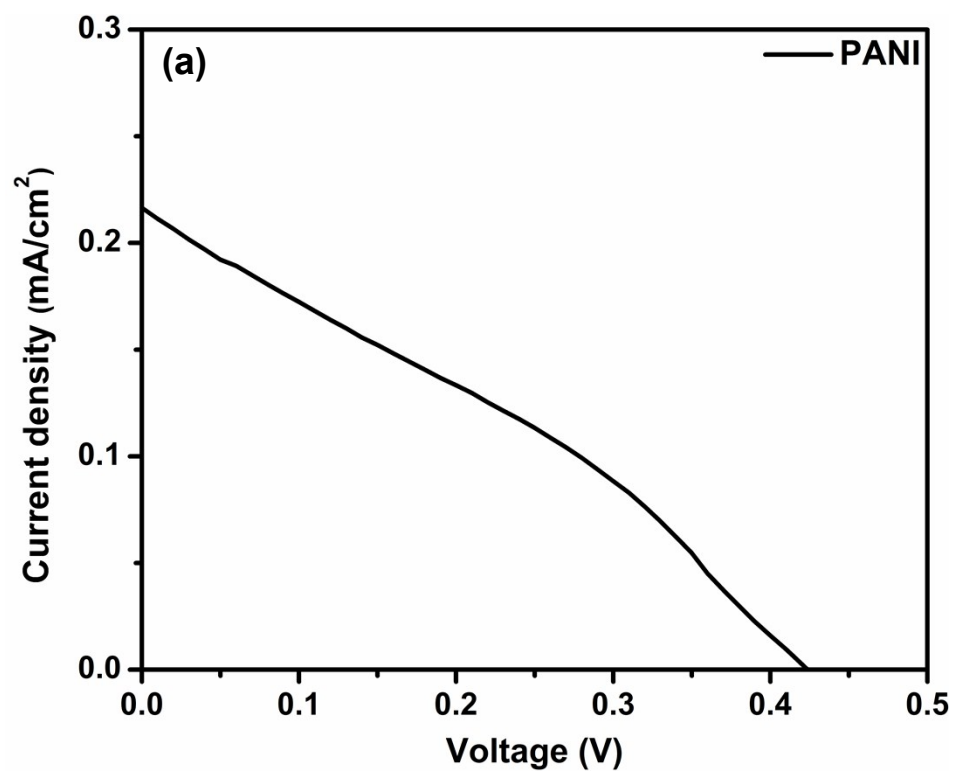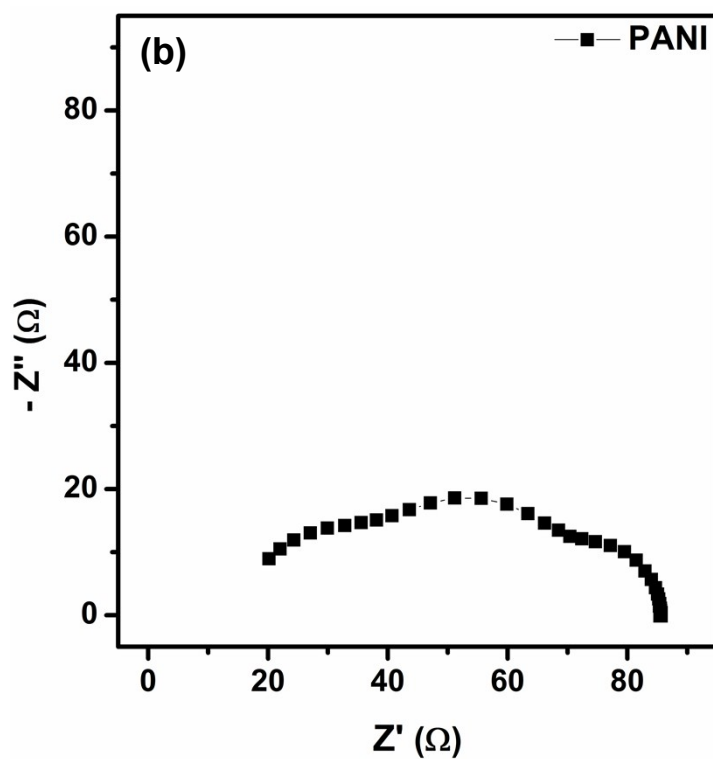

**Fig. S8:** (a) J-V characteristics plot of PANI based DSSCs under AM 1.5G 100 mW/cm<sup>2</sup> illumination (b) Nyquist plot of PANI based DSSC.

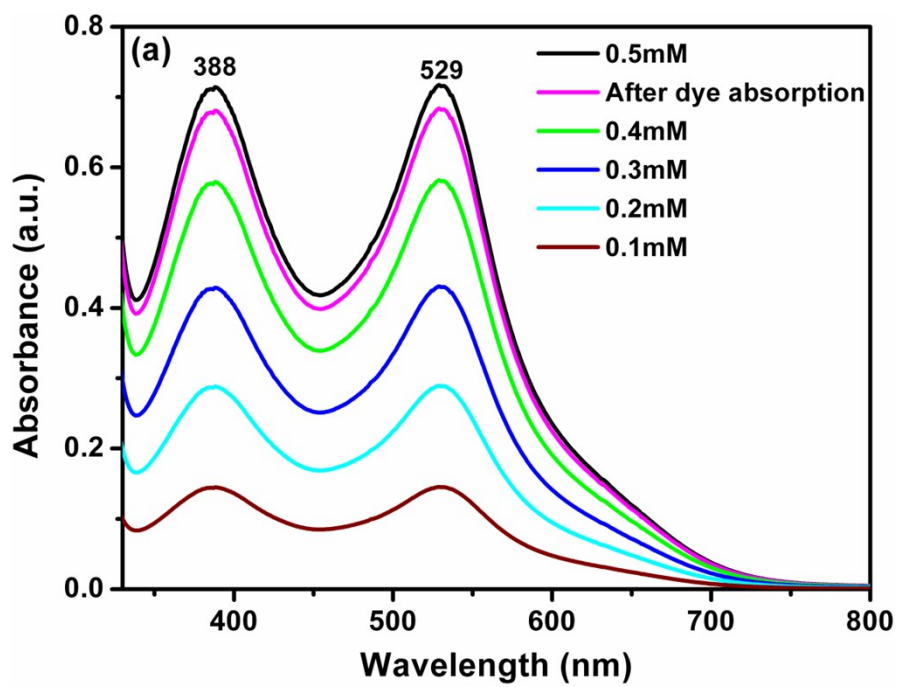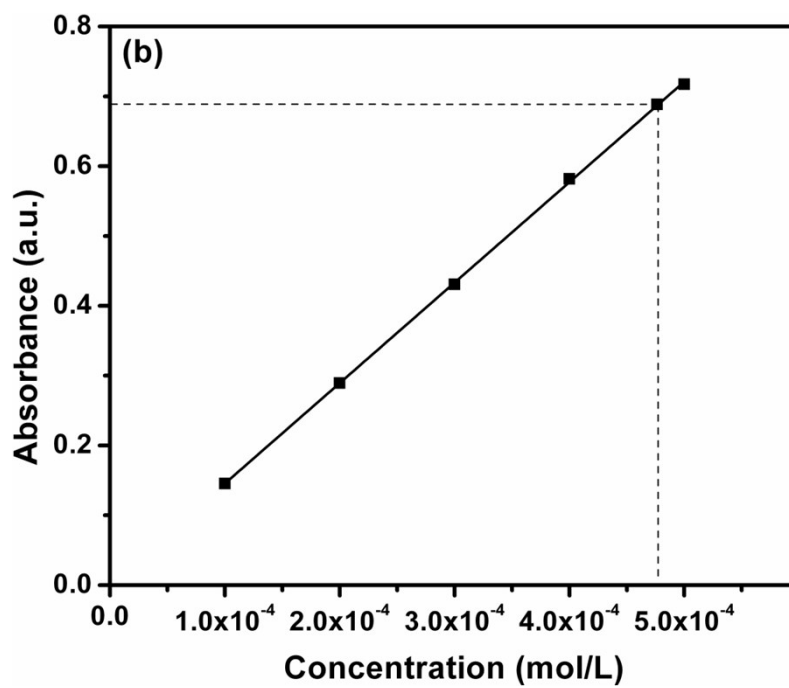

**Fig. S9:** (a) Absorbance spectra for N719 dye at different concentration in ethanol (b) Calibration curve for N719 dye samples at 529 nm.
